# Supplementary material for: WoSIS: Serving standardised soil profile data for the world
Source: Copernicus journal article supplement (doi:10.5194/essd-2016-34), 2016-10-21
Supplement: Supplementary file [file essd-2016-34-AC2-supplement.pdf]

## Author response to Referee #2 : ESSDD-2016-34-RC1

Dear Dr Samuel-Rosa,

Thank you for your kind words about ISRIC's long-term role as trusted broker of quality-assessed soil information and your constructive review.

Below we address your queries and suggestions in the order that they are raised in the referee report. Revised texts are indicated in blue in the author's comments and accompanying adapted manuscript (which also includes our response to Reviewer 1).

**Referee Comment 1 (RC1):** How does ISRIC approach potential data providers? What are the strategies used by ISRIC to deal with bureaucratic – and political – issues? How can an individual or organization contribute data for inclusion in WoSIS? What immediate benefits one can expect when contributing soil data?

**Author Response (AR1):** These are indeed important observations. We now realise that we had omitted to add a reference to ISRIC's Data Policy, which outlines the terms under which data providers may share their data with ISRIC and how these contributions/materials should be acknowledged and cited by data users. We also added some text outlining how potential data providers may contribute data to the WoSIS effort (see Section 2.1): “Everyone may contribute data for inclusion in WoSIS. Data may be submitted in various ways. Analogue data should be provided using a template with standardised variable names as described in the WoSIS Procedures Manual (Ribeiro et al., 2015, p. 378-40). Alternatively, large digital data sets comprising over thousand profiles can be provided to ISRIC as zip files containing the database, documentation and metadata. Prior to any data processing at ISRIC, the data provider must agree in writing with the terms of the Data Policy (ISRIC, 2016).”

Some (fairly) immediate benefits data providers may expect will be an update of the SoilGrids soil property and class maps for their country or region, once a new set of SoilGrids is released. Also, we provide training and capacity building on methodologies, provided there are external project funds for this. Many potential data providers and data users attend our annual Spring School, which may provide the basis for a guest researchership at our institute.

So far, potential data contributors have mainly been contacted directly using our international network. We are addressing the above mentioned ‘bureaucracy and political issues’ mainly through participation in larger networks, that operate at the “supra-national” level, such as the Global Soil Partnership and GODAN that are working towards free and open data. A discussion of these issues, however, we consider beyond the scope of this data paper (see e.g. [http://www.isric.org/sites/default/files/ISRIC\\_Report\\_2013\\_05\\_LR.pdf](http://www.isric.org/sites/default/files/ISRIC_Report_2013_05_LR.pdf)).

**RC2:** In the current version of WoSIS, about 20% of the soil profiles do not have a quantitative georeference, i.e. numeric geographic coordinates. This is a hindrance to their usage. Thus, the question: What are the strategies planned for attributing numeric geographic coordinates to soil profiles that lack this sort of information?

**AC2:** Of course, we would prefer have only georeferenced data in the WoSIS database. However, some legacy data come without adequate geographic information to accurately pinpoint their location. Realistically, filling such gaps remains the responsibility of the data providers as they best know their resources; this could become an important task in the framework of the Global Soil Partnership, which could develop an on-line platform for doing this. Once the coordinates are provided together with the original profile identifier, they can be easily accommodated in the WoSIS database. That being said, profiles that lack coordinates, though not suited for digital soil mapping purposes, can be very useful for traditional soil mapping purposes and to derive pedotransfer and taxotransfer functions.

**Specific comments:**

**RC3:** Figure 2. Some text is unexpectedly underlined. Consider removing the underline or explaining its usage. Also, consider using a comma as a Thousands separator as it has been used in other parts of the text, e.g. the abstract.

**AC3:** Thanks, done.

**RC4:** Figure 4 (title): There is a typo in the figure title: “Location op soil profiles [...]” should read “Location of soil profiles [...]”.

**AC4:** Thanks, done.

**RC5:** Figure 4: I suggest reducing the width of points so that the figure gives a more realistic view of under-represented regions of the world. In the current format it gives the false impression that, for example, Latin America (except for Paraguay and parts of Chile and Argentina) is already well represented and Latin Americans should not bother contributing more data. Also, consider presenting a summary table with the countries with the highest profile density (number of profiles per surface area) in WoSIS.

**AC5:** We have addressed this point by adding profile counts per continent (Section 3) and by country (see Appendix C, with number of profiles and profile densities). The text has been adapted:

“The number of profiles per continent is highest for North America (63,077) and Africa (17,153), followed by South America (8,970), Asia (3,089), Europe (1,908), Oceania (235), and Antarctica (9). These profiles come from 148 countries; the average density of observations is 0.7 profiles per 1000 km<sup>2</sup>. The actual density of observations varies greatly, both between countries (Appendix C) and within each country (Fig. 4). Such geographic gaps will be filled gradually in the future, this largely depending though on the willingness or ability of data providers to freely share (some of) their data for consideration in WoSIS. Alternatively, it should be

noted here that some recently shared datasets are not yet included in the present snapshot (e.g. Australia, Canada and Cambodia).”

**RC6:** Finally, I must note that I agree with the comments and notes of Hugelius (2016), and would like to reinforce the suggestion of also serving all data in a single large CSV file. In this case, for ease of use, I would suggest omitting the metadata, which should only be available in the single soil property files.

**AC6:** As indicated in our reply to Gustaf Hugelius (Referee 1), we have considered this issue very carefully. The “snapshot” data are now presented in a format that should be much more user friendly, namely using three txt files that can be easily uploaded into an SQL database or similar (R software) for further use. For details on the file structure please see our response to the Dr Hugelius, Appendix B, as well as the revised ‘Readme First’ file that comes with the zipped snapshot.

# WoSIS: ~~Providing~~**Serving** standardised soil profile data for the world

Niels Batjes<sup>1</sup>, Eloi Ribeiro<sup>1</sup>, Ad van Oostrum<sup>1</sup>, Johan Leenaars<sup>1</sup>, Tom Hengl<sup>1</sup>, and Jorge Mendes de Jesus<sup>1</sup>

<sup>1</sup> ISRIC – World Soil Information, Wageningen, 6708 PB, The Netherlands

5 *Correspondence to:* Niels H. Batjes ([niels.batjes@isric.org](mailto:niels.batjes@isric.org))

**Abstract.** The aim of the World Soil Information Service (WoSIS) is to serve quality-assessed, georeferenced soil data (point, polygon, and grid) to the international community upon their standardisation and harmonisation. So far, the focus has been on developing procedures for legacy point data with special attention for the selection of soil analytical and physical properties considered in the *GlobalSoilMap* specifications (e.g. organic carbon, soil pH, soil texture (sand, silt, and clay), coarse fragments (< 2mm), cation exchange capacity, electrical conductivity, bulk density, and water holding capacity). Profile data managed in WoSIS were contributed by a wide range of soil data providers; the data have been described, sampled, and analysed according to methods and standards in use in the originating countries. Hence, special attention was paid to measures for soil data quality and the standardisation of soil property definitions, soil property values, and soil analytical method descriptions. ~~At the time of writing, The present version of the full~~ WoSIS database contained ~~s~~ some 15 118,400 unique “shared” soil profiles of which ~~some over~~ 96,000 are georeferenced within defined limits. In total, this corresponds with over 31 million soil records, of which some 20% have so far been quality-assessed and standardised using the ~~sequential~~ procedures discussed in this paper. The number of measured data for each property varies between profiles and with depth, generally depending on the purpose of the initial studies. Overall, the data lineage strongly determined which data could be standardised with acceptable confidence ~~in accord with WoSIS procedures (as flagged in the database),~~ 20 ~~corresponding with over 4 million records for 94,441 profiles.~~ The publically available data –WoSIS snapshot of July 2016– are persistently accessible from ISRIC WDC-Soils through <http://dx.doi.org/10.17027/isric-wdcsoils.20160003>.

## 1 Introduction

Soil is an important provider of ecosystem services (UNEP, 2012; MEA, 2005). Yet this natural resource, considered to be 25 non-renewable on a human life span, is being threatened (FAO and ITPS, 2015; UNEP, 2014). Worldwide, professionals, scientists, “decision makers and managers must have access to the information they need, when they need it, and in a format they can use” (GEO, 2010). Large numbers of consistent soil profile data of known provenance (lineage) are needed to accurately model and map the status of the world’s soil resources at increasingly detailed resolutions (Omuto et al., 2012; Hengl et al., 2014; Arrouays et al., 2014; FAO and ITPS, 2015).

This paper describes procedures for safeguarding, standardising/harmonising and subsequently serving of consistent world soil data to the international community as developed in the framework of the Data\WoSIS (World Soil Information Service) project. In essence, the development of the WoSIS server database may be seen as a sequel to earlier collaborative, but still “stand-alone”, compilations of soil legacy data coordinated by ISRIC such as WISE (Batjes, 2009), SOTER (van Engelen and Dijkshoorn, 2013), and the Africa Soil Profiles database (Leenaars, 2013). Ultimately, WoSIS aims to serve consistent harmonised soil data (point, polygon and grids), derived both from a wide range of shared legacy holdings as well as from recently developed soil spectral libraries (e.g. Viscarra Rossel et al., 2016; Shepherd and Walsh, 2002), in an interoperable mode and this preferably in the setting of a federated global soil information system.

Harmonisation, as defined by the Global Soil Partnership (GSP, Baritz et al., 2014), involves “providing mechanisms for the collation, analysis and exchange of consistent and comparable global soil data and information”. Areas of harmonisation include those related to: a) soil description, classification and mapping, b) soil analyses, c) exchange of digital soil data, and d) interpretations. So far, seen the breadth and magnitude of the task, the focus in WoSIS has been on the standardisation of soil property definitions, soil analytical method descriptions and soil property values for those properties considered in the GlobalSoilMap specifications (GlobalSoilMap, 2013). Such a standardisation is a prerequisite for the development/testing of a soil information model that can underpin global soil data interoperability and modelling (Omuto et al., 2012). Quality assessed profile data served from WoSIS, and its predecessors as discussed above, may be used for various purposes such as conventional respectively digital mapping of soil properties and soil classes (Batjes, 2016; Hengl et al., 2015; Hengl et al., 2016). In turn, such derived products may be used in studies that address a range of global issues at various scale levels (e.g. Hendriks et al., 2016; Luo et al., 2016; Jones and Thornton, 2015; Maire et al., 2015).

20

## 2 Data and methods

### 2.1 Basic principles

Everyone may contribute data for inclusion in WoSIS. [Data may be submitted in various ways. Analogue data should be provided using a template with standardised variable names as described in the WoSIS Procedures Manual \(Ribeiro et al., 2015, p. 378-40\). Alternatively, large digital data sets comprising over thousand profiles can be provided to ISRIC as zip files containing both the database, documentation and metadata. Prior to any data processing at ISRIC, the data provider must agree in writing with the terms of the Data Policy \(ISRIC, 2016\).](#)

The access rights and data provenance (lineage), as documented in the metadata, will determine which quality assessed-data may later be served freely to the international community. Therefore, when processing the wealth of contributed data, priority is given to those datasets that have a “non-restrictive” Creative Commons licence, defined here as at least a CC BY (Attribution) or CC BY-NC (Attribution Non-Commercial). The corresponding source data will be gradually standardised

30

and harmonised to make them “comparable as if assessed by a given (reference) method” (Fig. 1). Ultimately, only the quality-assessed and standardised/harmonised “shared” data will be served to the international community.

<< Insert Figure 1 >>

## 5 2.2 Measures for data quality

As indicated, soil profile data submitted for consideration in WoSIS were collated according to various national or international standards. Therefore, proper documentation, in so far as possible, of the provenance and identification of each dataset, and ideally each observation or measurement, is essential to allow for efficient processing of the data; such aspects are discussed later in detail.

10 For soil observations and measurements, the following need to be specified: feature (x-y-z and time (t) referenced profiles and layers), attribute (class, site, layer-field, and layer-lab), method, and value, including units of expression (Leenaars, 2013; Leenaars et al., 2014; Ribeiro et al., 2015). As indicated by Chapman (2005), “too often, data are used uncritically without consideration of the error contained within, and this can lead to erroneous results, misleading information, unwise environmental decisions and increased costs”. WoSIS is being populated using data produced for different types of studies  
15 ranging from routine soil surveys to more specific assessments, each of these having their specific quality requirements (Landon, 1991; Soil Survey Division Staff, 1993). The corresponding samples were analysed in a range of laboratories or in the field according to a wide range of methods (e.g. wet chemistry or soil spectroscopy), each with their own uncertainty and costs. As indicated by Kroll (2008), issues of soil data quality are not restricted to uncertainty issues; they also include aspects like completeness, accessibility and verifiability (traceability) of data.

20 A review of quality aspects specifically related to soil data led to consideration of ~~three~~four quality indicators in WoSIS: (a) observation date (date of observation or measurement), (b) level of trust (a subjective measure inferred from soil expert knowledge), and (c) ~~data quality rating (based on expert judgement), and (d)~~ accuracy (an indicator for the laboratory and field-related uncertainty as well as the accuracy of georeferencing). These indicators provide measures that allow  
25 ~~investigators the WoSIS database manager~~ to recognise factors that may compromise the quality of certain data and hence their suitability for use. Consideration of such quality indicators ensures that objective methods are applied for evaluating data in the database, while at the same time the system enables soil expert knowledge to override these assessments when needed. In practice, however, the information provided with some source materials does not allow for a full characterisation of all ~~three~~four indicators. In particular, the accuracy of individual analytical measurements is seldom expressed in the source databases as such information is generally maintained in separate soil laboratory information systems (see van  
30 Reeuwijk, 1998; WEPAL, 2015) to which we have no access. Alternatively, a measure for the positional accuracy is provided for each profile (e.g., “0.01” when degrees, minutes and seconds are provided, see Ribeiro et al. 2015, p. 90).

### 2.3 Standard data model

Sometimes, the source data may be in paper (analogue) format in which case they must first be digitised following certain basic criteria (Ribeiro et al., 2015, p. 37-40; Leenaars et al., 2014, p. 52). Preferably, data entry is done by the data providers, as they best know their data. Basically, this first step amounts to “safeguarding soil data collections” at risk of being lost.

5 This is an important remit of ISRIC as World Data Centre for Soils (WDC-Soils) of the ICSU World Data System.

Any submitted digital data set is first assessed as regards its overall suitability for inclusion in WoSIS (e.g. licence and metadata). After this filtering, the data are imported “as is” into PostgreSQL, an open source database management system.

At this early stage of processing, the data are still organised according to numerous data models, data conventions and data contents. So, the next step (yet first step of standardisation) is to map this disparate data to the WoSIS *standard data* model

10 (Fig. 1); technical details are provided elsewhere (Ribeiro et al., 2015).

[<< Insert Figure 1 >>](#)

### 2.4 Identifying repeated profiles

15 Being derived from multiple data sources, some of which are compilations, there is a risk that the same profiles are imported several times into WoSIS *albeit* using different identifiers. Computerised procedures that consider lineage and geographical proximity checks were developed to screen for possible repeated profiles. [The lineage check considers the data source identifiers, uses this information to trace the original data source, and from there looks for duplicates. Alternatively, the](#)

20 [proximity check is based on the geographic coordinates. It first identifies profiles that are suspiciously close to another \(e.g. < 10 m\). Subsequently, the information for these profiles is compared and the database manager assesses the likelihood of such profiles being identical \(Ribeiro et al. p. 5-6\).](#) Figure 2 serves to show the results of this time-consuming process for four databases: ISIS (2016), the ISRIC Soil Information System (reference collection); WISE, World Inventory of Soil Emission potentials (compilation, Batjes, 2009); SOTER, Soil and Terrain databases (compilation, Van Engelen, 2011); and AfSP, the Africa Soil Profiles database (compilation, Leenaars, 2013). For example, 12,810 profiles are present only in

25 AfSP, 35 are shared among AfSP and ISIS (the original source), 164 are shared between AfSP, WISE and ISIS, and 10 profiles occur in the four databases. In case of duplicate profiles, [all the corresponding data will nonetheless be standardised as described below \(i.e. the “flagged” data are maintained in the WoSIS database\).](#) However, ultimately, [only the profile with the most complete data and detailed lineage will be distributed \(see Sect. 3\)](#) ~~is maintained for further processing.~~

30 << Insert Figure 2 >>

## 2.5 Basic data quality assessment and control

5 ~~For All data sources data~~ are submitted ~~subsequent~~ to ~~the same basic~~ QA/QC checks, building on procedures developed for the WISE (Batjes, 1995, p. 52-53) and AfSP (Leenaars, 2013, p. 125-128) database. For example, this includes checks on referential integrity, data types, geo-location, units of expression, domain ranges, as well as possible “latitude-longitude inversions” in profile coordinates. ~~I~~ it is assumed that the quality requirements of the ~~(first) user data provider~~ are met and that basic quality checks and screening have taken place, this with due consideration for any soil-specific options in the laboratory procedures (Ribeiro et al., 2015). This approach allows users of WoSIS ~~derived data sets~~ to make their own judgement on the quality of individual analytical data, for instance by the assumption that selected data have comparable quality characteristics or an acceptable (inferred) quality compared to their requirements.

10

## 2.6 Standardisation of soil analytical method descriptions

As indicated, there is often no detailed quantitative information on the quality and uniformity of the soil analytical data held in the diverse source databases. Full quality control, including verification of in-profile ~~edon~~ consistencies, requires the data to be harmonised according to an analytical reference method. The foreseen ultimate step of data harmonisation, converting property values assessed with analytical method X to values “as if” assessed by reference method Y, requires an unambiguous identification and definition of the various analytical methods. Therefore, it was first necessary to develop a qualitative procedure to describe the analytical methods, including their method features, in a flexible, yet comprehensive and consistent way.

15  
20 The options selected for the analytical method features in WoSIS are assigned on basis of the descriptions in the respective (database) sources. This implies that information, as interpreted or distilled from the original report (source materials) by the data compilers, was used in WoSIS. In the future, some refinements may still prove possible or necessary should the original materials, such as laboratory manuals, be consulted again.

25 In essence, the WoSIS approach for the qualitative description of soil analytical methods can be seen as complementary to method descriptions used in reports from proficiency tests (NATP, 2015; van Reeuwijk, 1998; WEPAL, 2015). In such tests, results from participants are coded to provide details of the methods applied for a particular grouping (e.g. CEC, cation exchange capacity). As discussed in Ribeiro et al. (2015), the spread of these results may give an indication for the maximum spread in a compiled database.

30 In addition to the method description according to the standardised coding system developed for WoSIS, measures have been allocated for the inferred confidence in each “method conversion” (i.e. from low to high); of necessity, this qualitative assessment is based solely on the information embedded in the “summarised” method descriptions as provided in the various source databases. As indicated, such descriptions have often been generalised from a more detailed source, such as a



laboratory manual. Importantly, the provided confidence flags should not be seen as a measure for the quality of a particular laboratory.

## 2.7 Towards the harmonisation of world soil data

5 | Depending on the projected applications, user communities will require specific sets of data. [As indicated, in the first](#)  
[version instance](#), we limited ourselves to the list of properties considered in the GlobalSoilMap specifications  
(GlobalSoilMap, 2013): soil pH, soil organic ~~matter~~-[carbon](#) content, effective cation exchange capacity, electrical  
conductivity, soil texture (sand, silt, and clay content), proportion of fragments > 2 mm, bulk density and water retention. In  
the respective source databases, these properties were determined using a range of analytical procedures, thus requiring  
10 | standardisation of the soil analytical method descriptions to make them “fit for use” and comparable (Leenaars et al., 2014).  
Key in the approach developed for WoSIS is that “a property is best described by key elements of the (laboratory) procedure  
applied” (Soil Survey Staff, 2011). Similarly, in WoSIS, major features of commonly used methods for determining a given  
soil property are characterised. For soil pH, for example, these are the solution, concentration, ratio (soil/solution), and  
instrument. As indicated, the key component features can be aggregated where considered as being comparable in the  
15 | context of global or regional level data analyses. For example, soil pH data measured in a KCl solution, 1M, at a soil/liquid  
ratio of 1:5, and using a conventional electrode can be aggregated within the group considered to meet the ISO 10390:2005  
criteria for pH-KCl (ISO, 2015). Similarly, the combination KCl solution, 1 M, 1:2.5 soil/liquid ratio, and conventional  
electrode broadly corresponds with ISRIC criteria (van Reeuwijk, 2002). Similar principles were applied for all soil  
properties under consideration here; ~~methodological details are provided in~~ [as described in](#) Ribeiro et al. (2015, [p. 47-53](#)).  
20 | A next, desired step would be to make the data (e.g. pH, CEC or organic carbon) comparable, “as if” assessed by a single  
given (reference) method. That is, fully “harmonised” and unambiguously defined. However, there is generally no universal  
equation for converting property values from one method to another in all situations (GlobalSoilMap, 2013; Jankauskas et  
al., 2006; Lettens et al., 2007). Basically, this implies that within the framework of the Global Soil Partnership (GSP), for  
example, each regional or continental node will need to develop and apply node-specific conversion functions (towards the  
25 | yet to be defined GSP-adopted standard reference methods, see Baritz et al. 2014), building on comparative analyses using  
say archived soil samples and spectral libraries.

## 3 Serving consistent standardised data

30 | [The WoSIS server database itself](#) provides an important building block for the spatial data infrastructure (Fig. 3) through  
which ISRIC WDC-Soils will be serving an increasing range of data (point, raster and polygon) to the international  
community (Batjes et al., 2013; Hengl et al., 2016). The most recent set of WoSIS-derived [point](#) data is served “[24/7](#)” via an

OGC-compliant WFS (Web Feature Service) provided by GeoServer instance. These data may be accessed freely via the following webpage: <http://www.isric.org/content/wosis-distribution-set>. By its nature, however, this dataset will be *dynamic* as it will grow when additional point data are processed, additional soil attributes are considered, and/or when possible corrections are required. Therefore, for consistent modelling and citation purposes, we provide static snapshots of the standardised data with clear time stamps, in tab separated values format. Each snapshot will have a unique name and Digital Object Identifier (DOI), for example file *WoSIS\_2016\_July.zip* with doi: [10.17027/isric-wdcsoils.20160003](https://doi.org/10.17027/isric-wdcsoils.20160003).

<< Insert Figure 3 >>

At the time of writing, the WoSIS server database contained some 118,400 unique “shared” soil profiles, out of which over 96,000 are georeferenced within defined limits, corresponding with some 31 million soil records in total. So far, some 20% thereof have been quality-assessed and standardised using the sequential procedure discussed in this paper. As indicated, the number of measured data for each property varies between profiles and with depth, generally depending on the purpose of the initial studies. Therefore, the data lineage strongly determined which specific data could be served with acceptable confidence (as flagged in the central WoSIS database, see Ribeiro et al. 2015, p. 92). By implication, the “July 2016” snapshot only includes standardised data for 94,441 geo-referenced profiles, representing some 455 thousand layers (or horizons). In total, this corresponds with over 4 million records that include both numeric (19, e.g. sand content or soil pH) as well as class (3, e.g. WRB soil classification) properties. The naming conventions, units of measurement, and file structure are described in Appendix A and B, respectively.

The number of profiles per continent is highest for North America (63,077) and Africa (17,153), followed by South America (8,970), Asia (3,089), Europe (1,908), Oceania (235), and Antarctica (9). These profiles come from 148 countries; the average density of observations is 0.7 profiles per 1000 km<sup>2</sup>. The actual density of observations varies greatly, both between countries (Appendix C) and within each country (Fig. 4). Such geographic gaps will be filled gradually in the future, this largely depending though on the willingness or ability of data providers to freely share (some of) their data for consideration in WoSIS. Alternatively, it should be noted here that some recently shared datasets are not yet included in the present snapshot (e.g. Australia, Canada and Cambodia).

<< Insert Figure 4 >>

#### 4 Towards global soil data interoperability

So far, all datasets managed in WoSIS were provided as “stand-alone” databases; as such their content is “static”. Steps are being made towards the development of a federated, and ultimately inter-operable, service or Spatial soil Data Infrastructure (SDI); through which source data are served and updated by the respective data providers and made queryable according to the agreed upon data standards. A first, possible step in this direction -though not yet interoperable- is the exchange of data in a PostgreSQL environment using a Foreign Data Wrapper (FWD). Subsequently, the “transferred” data can be mapped to the WoSIS data model for further standardisation and harmonisation as described earlier. A technically more challenging solution for the worldwide exchange of soil data was implemented during the OGC Soil Data Interoperability Experiment (soilIE).

- 10 SoilIE, undertaken in the second half of 2015, had the objective of developing and testing a soil standard that harmonised existing standards for data exchange defined in Europe and Oceania. During the SoilIE, partners from Europe and Oceania mapped their test data to the SoilML format. Multiple OGC Web Feature Services (WFS) providing data in soilML format were established, allowing for on-line derivation of new data (e.g. using pedotransfer functions). The SoilIE was successful in accessing data in multiple clients (servers) from several soil data providers, each using their own software configurations (Ritchie, 2016). Further collaboration will involve refinements to the SoilML schema, Resource Description Foundation (RDF) vocabularies, linked data, and other remaining issues.

Use of OGC web services and modelling data in XML is necessary for fulfilment of compliance requirements with regional interoperability initiatives (INSPIRE, 2015; GS Soil, 2008; Wilson, 2016). The output of the data can then be customised between different XML standards using Extensible Stylesheet Language (XSL) templates or using server schema mapping.

- 20 The above activities in support of a global soil SDI were initiated by the GlobalSoilMap consortium in Wageningen, 2009, and may be consolidated within the framework of the Global Soil Partnership (FAO-GSP, 2014b, a; IUSS WG-SIS, 2015) and related interoperability efforts in other domains (e.g. Porter et al., 2015; GEOSS, 2012; GODAN, 2015).

#### 5 Data availability

- 25 Version WoSIS\_2016\_July, as described in this paper, is archived for long-term storage at ISRIC – World Soil Information, the World Data Center (WDC) for Soils of the ICSU World Data System; it may be accessed freely through [doi: 10.17027/isric-wdcsoils.20160003](https://doi.org/10.17027/isric-wdcsoils.20160003). [The zip file \(32 Mb\) includes a detailed “readme first” file that describes key aspects of the dataset.](#)

#### 6 Conclusions

- 30 Bringing disparate soil databases from numerous sources under a common standard poses many and diverse challenges. So far, the focus in WoSIS has been on the standardisation of soil property definitions, soil analytical method descriptions and

soil property values in order to serve consistent, quality-assessed data that have been observed or measured according to analytical procedures (aggregates) that are functionally comparable.

5 Future releases of WoSIS-served data will consider a wider selection of soil site and layer properties, assessed by conventional soil analytical procedures as well as by soil spectroscopy. Further, grid and polygon maps will be gradually added to the server database. Each release (snapshot) will be given a unique time stamp and digital object identifier.

10 The WoSIS server database forms an important building block of ISRIC's evolving spatial data infrastructure. Instrumental to enhanced usability of the data served by WoSIS will be the actual harmonisation of soil property values as well as the further standardisation of identifiers and descriptions of soil analytical procedures. Development of corresponding interfaces will allow for the fulfilment of future exchange of, and demands, for global soil information and enable further processing of soil data shared by contributing parties.

WoSIS-related activities are already catalysing institutional collaboration with institutes in Africa, Europe and Latin America. Capacity building and cooperation among (inter)national soil institutes around the world is essential to create and share ownership of the soil information newly derived from the shared data. Also to strengthen the necessary expertise and capacity to further develop and test the world soil information service worldwide.

15

**Appendix A: Naming conventions and descriptions of variables provided in the “WOSIS July 2016” snapshot served from the ISRIC World Soil Information Service**

| Code <sup>a</sup> | Attribute                                 | Unit                                              | Profiles | Layers  | Description                                                                                                                                                                                                                                                                                                                                                        |
|-------------------|-------------------------------------------|---------------------------------------------------|----------|---------|--------------------------------------------------------------------------------------------------------------------------------------------------------------------------------------------------------------------------------------------------------------------------------------------------------------------------------------------------------------------|
| BDFI              | Bulk density fine earth                   | kg dm <sup>-3</sup>                               | 20 727   | 105 848 | Bulk density of the fine earth fraction < 2 mm (kg/dm <sup>3</sup> )                                                                                                                                                                                                                                                                                               |
| BDWS              | Bulk density whole soil                   | kg dm <sup>-3</sup>                               | 25 909   | 153 568 | Bulk density of the whole soil including coarse fragments (kg/dm <sup>3</sup> )                                                                                                                                                                                                                                                                                    |
| TCEQ              | Calcium carbonate equivalent total        | g kg <sup>-1</sup>                                | 27 809   | 115 448 | The content of carbonate in a liming material or calcareous soil calculated as if all of the carbonate is in the form of CaCO <sub>3</sub> (g/kg in the fine earth fraction < 2 mm); also known as inorganic carbon                                                                                                                                                |
| CECX              | Cation exchange capacity (CEC)            | cmol <sub>(c)</sub> kg <sup>-1</sup>              | 48 461   | 273 346 | Capacity of the fine earth fraction < 2 mm to hold exchangeable cations, estimated by buffering the soil at specified pH (e.g. pH7 or pH8; cmol <sub>c</sub> /kg)                                                                                                                                                                                                  |
| CLAY              | Clay total                                | g kg <sup>-1</sup>                                | 80 082   | 408 452 | Gravimetric content of < 0.002 mm soil material in the fine earth fraction < 2 mm (g/100g)                                                                                                                                                                                                                                                                         |
| CFGR              | Coarse fragments gravimetric total        | 10 <sup>-2</sup> g g <sup>-1</sup>                | 27 050   | 159 206 | Gravimetric content of coarse fragments > 2 mm in the whole soil (g/100g)                                                                                                                                                                                                                                                                                          |
| CFVO              | Coarse fragments volumetric total         | 10 <sup>-2</sup> cm <sup>3</sup> cm <sup>-3</sup> | 37 280   | 198 534 | Volumetric content of the coarse fragments > 2 mm in the whole soil (cm <sup>3</sup> /100cm <sup>3</sup> )                                                                                                                                                                                                                                                         |
| ECEC              | Effective cation exchange capacity (ECEC) | cmol <sub>(c)</sub> kg <sup>-1</sup>              | 23 189   | 102 665 | Capacity of the fine earth fraction < 2 mm to hold exchangeable cations at the pH of the soil (ECEC, cmol <sub>c</sub> /kg). Conventionally approximated by summation of exchangeable bases (Ca <sup>2+</sup> , Mg <sup>2+</sup> , K <sup>+</sup> , and Na <sup>+</sup> ) plus 1 N KCl exchangeable acidity (Al <sup>3+</sup> and H <sup>+</sup> ) in acidic soils |
| ELCO              | Electrical conductivity                   | dS m <sup>-1</sup>                                | 28 266   | 120 039 | Ability of a 1:x soil water extract to conduct electrical current (EC <sub>x</sub> , dS/m); EC <sub>e</sub> refers to values measured in a saturated soil extract                                                                                                                                                                                                  |
| ORGC              | Organic carbon                            | g kg <sup>-1</sup>                                | 64 118   | 315 362 | Gravimetric content of organic carbon in the fine earth fraction                                                                                                                                                                                                                                                                                                   |
| PHCA              | pH CaCl <sub>2</sub>                      | unitless                                          | 39 074   | 237 756 | A measure of the acidity or alkalinity in soils, defined as the negative logarithm (base 10) of the activity of hydronium ions (H <sup>+</sup> ) in a CaCl <sub>2</sub> solution, as specified in the analytical method descriptions (dimensionless)                                                                                                               |
| PHAQ              | pH H <sub>2</sub> O                       | unitless                                          | 79 118   | 407 226 | A measure of the acidity or alkalinity in soils, defined as the negative logarithm (base 10) of the activity of hydronium ions (H <sup>+</sup> ) in water (dimensionless)                                                                                                                                                                                          |
| PHKC              | pH KCl                                    | unitless                                          | 19 064   | 88 127  | A measure of the acidity or alkalinity in soils, defined as the negative logarithm (base 10) of the activity of hydronium ions (H <sup>+</sup> ) in a KCl solution, as specified in the analytical method descriptions (dimensionless)                                                                                                                             |
| PHNF              | pH NaF                                    | unitless                                          | 4866     | 24 917  | A measure of the acidity or alkalinity in soils, defined as the negative logarithm (base 10) of the activity of hydronium ions (H <sup>+</sup> ) in a NaF solution, as specified in the analytical method descriptions (dimensionless)                                                                                                                             |
| SAND              | Sand total                                | 10 <sup>-2</sup> g g <sup>-1</sup>                | 78 402   | 398 573 | Larger than Y mm fraction of the < 2 mm soil material (g/100g); esd (equivalent spherical diameter), Y as specified in the analytical method descriptions                                                                                                                                                                                                          |
| SILT              | Silt total                                | 10 <sup>-2</sup> g g <sup>-1</sup>                | 79 331   | 406 502 | 0.002 mm to Y mm fraction of the < 2 mm soil material (g/100g); esd (equivalent spherical diameter), X respectively Y as specified in the analytical method descriptions                                                                                                                                                                                           |

| Code <sup>a</sup> | Attribute                         | Unit                                              | Profiles | Layers  | Description                                                                                                                                                         |
|-------------------|-----------------------------------|---------------------------------------------------|----------|---------|---------------------------------------------------------------------------------------------------------------------------------------------------------------------|
| CFAO              | Soil classification FAO           | unitless                                          | 24 894   | 24 894  | Classification of the soil profile according to specified edition (year) of the FAO-Unesco Legend, up to soil unit level when available                             |
| CSTX              | Soil classification Soil taxonomy | unitless                                          | 21 614   | 21 614  | Classification of the soil profile according to specified edition (year) of USDA Soil Taxonomy, up to subgroup level when available                                 |
| CWRB              | Soil classification WRB           | unitless                                          | 24 628   | 24 628  | Classification of the soil profile according to specified edition (year) of the World Reference Base for Soil Resources (WRB), up to qualifier level when available |
| TOTC              | Total carbon                      | g kg <sup>-1</sup>                                | 14 094   | 70 687  | Gravimetric content of organic carbon and inorganic carbon in the fine earth fraction < 2 mm (g/kg)                                                                 |
| WRGR              | Water retention gravimetric       | 10 <sup>-2</sup> g g <sup>-1</sup>                | 28 701   | 173 972 | Soil moisture content by weight, at the tension specified in the analytical method descriptions (g/100g)                                                            |
| WRVO              | Water retention volumetric        | 10 <sup>-2</sup> cm <sup>3</sup> cm <sup>-3</sup> | 17 124   | 82 695  | Soil moisture content by volume, at the tension specified in the analytical method descriptions (cm <sup>3</sup> /100cm <sup>3</sup> )                              |

<sup>a</sup> A full complement of all these attributes is generally not available for many profiles (see text).

## Appendix B: Structure of the “July 2016” WoSIS snapshot

This Appendix describes the structure of the data files presented in the “July 2016” WoSIS snapshot:

- [wosis\\_201607\\_attributes.txt](#)
- [wosis\\_201607\\_profiles.txt](#), and
- [wosis\\_201607\\_layers.txt](#).

The first file lists the four letter code for each attribute, a short explanation, and the units of measurement, respectively (Appendix A). This file also gives the number of profiles and layers in the present snapshot.

The second file lists the unique profile ID (i.e. primary key), country name and ISO country code, geometric accuracy, latitude and longitude (WGS 1984) as well as information on the soil classification system and edition. Depending on the soil classification system used, the number of fields will vary. For example, for US Soil Taxonomy, coded here as “cstx”, these are: order, suborder, great group and subgroup as indicated in the column headings.

The third, largest file, lists all the soil properties by layer and profile to enhance user-friendliness. It starts with:

|                         |                                                                                     |
|-------------------------|-------------------------------------------------------------------------------------|
| <u>profile_id</u>       | <u>identifier for profile, links to file <a href="#">wosis_201607_profiles</a>.</u> |
| <u>profile_layer_id</u> | <u>unique identifier for layer for given profile (primary key)</u>                  |
| <u>top</u>              | <u>upper depth of layer (or horizon)</u>                                            |
| <u>bottom</u>           | <u>lower depth of layer</u>                                                         |

Subsequently, the following items are listed sequentially per attribute (“xxxx”) as defined under “code” in file [wosis\\_201607\\_attributes.txt](#):

|                   |                                                                                                                                                                                                       |
|-------------------|-------------------------------------------------------------------------------------------------------------------------------------------------------------------------------------------------------|
| <u>xxxx_value</u> | <u>array listing all values for soil property “xxxx” for the given layer; thus, more than one observation can be reported when available, for example 3 values for ORGC: {1:0.55, 2:1.01, 3:0.85}</u> |
|-------------------|-------------------------------------------------------------------------------------------------------------------------------------------------------------------------------------------------------|

|                       |                                                                    |
|-----------------------|--------------------------------------------------------------------|
| <u>xxxx_value_avg</u> | <u>average, for above (use this value for “routine” modelling)</u> |
|-----------------------|--------------------------------------------------------------------|

|                          |                                                             |
|--------------------------|-------------------------------------------------------------|
| <u>xxxx_method</u>       | <u>array listing the method descriptions for each value</u> |
| <u>xxxx_date</u>         | <u>array listing the date of observation for each value</u> |
| <u>xxxx_dataset_id</u>   | <u>abbreviation for source data set (e.g. WD-ISIS).</u>     |
| <u>xxxx_profile_code</u> | <u>code for given profile</u>                               |
| <u>xxxx_licenset</u>     | <u>licence for given data (CC-BY-NC or CC-BY)</u>           |

(...) as above, but for the next attribute

All fields in the above files are tab-delimited, while double quotation marks serve as text delimiters; file coding is according to the UTF-8 unicode transformation format. As such, the files can be easily imported into an SQL database or statistical software such as R, after which they may be joined using the unique profile id.

5

10



## Appendix C: Number of profiles by country and continent.

| Continent | Country_name             | ISO code | N of profiles | Area (km <sup>2</sup> ) | Profile density (per 1000 km <sup>2</sup> ) |
|-----------|--------------------------|----------|---------------|-------------------------|---------------------------------------------|
| Africa    | Algeria                  | DZ       | 4             | 2 308 647               | 0.002                                       |
|           | Angola                   | AO       | 1035          | 1 246 690               | 0.830                                       |
|           | Benin                    | BJ       | 738           | 115 247                 | 6.404                                       |
|           | Botswana                 | BW       | 898           | 578 247                 | 1.553                                       |
|           | Burkina Faso             | BF       | 887           | 273 281                 | 3.246                                       |
|           | Burundi                  | BI       | 36            | 26 857                  | 1.340                                       |
|           | Cameroon                 | CM       | 455           | 465 363                 | 0.978                                       |
|           | Central African Republic | CF       | 87            | 619 591                 | 0.140                                       |
|           | Chad                     | TD       | 5             | 1 265 392               | 0.004                                       |
|           | Congo                    | CG       | 70            | 340 599                 | 0.206                                       |
|           | Côte d'Ivoire            | CI       | 254           | 321 762                 | 0.789                                       |
|           | Dem. Rep. of the Congo   | CD       | 374           | 2 329 162               | 0.161                                       |
|           | Egypt                    | EG       | 22            | 98 2161                 | 0.022                                       |
|           | Ethiopia                 | ET       | 1583          | 1 129 314               | 1.402                                       |
|           | Gabon                    | GA       | 46            | 264 022                 | 0.174                                       |
|           | Ghana                    | GH       | 163           | 238 842                 | 0.682                                       |
|           | Guinea                   | GN       | 62            | 243 023                 | 0.255                                       |
|           | Guinea-Bissau            | GW       | 18            | 30 740                  | 0.586                                       |
|           | Kenya                    | KE       | 504           | 582 342                 | 0.865                                       |
|           | Lesotho                  | LS       | 33            | 30 453                  | 1.084                                       |
|           | Liberia                  | LR       | 48            | 96 103                  | 0.499                                       |
|           | Libya                    | LY       | 14            | 1 620 583               | 0.009                                       |
|           | Madagascar               | MG       | 52            | 588 834                 | 0.088                                       |
|           | Malawi                   | MW       | 2985          | 118 715                 | 25.144                                      |
|           | Mali                     | ML       | 756           | 1 251 471               | 0.604                                       |
|           | Mauritania               | MR       | 11            | 1 038 527               | 0.011                                       |
|           | Morocco                  | MA       | 27            | 414 030                 | 0.065                                       |
|           | Mozambique               | MZ       | 275           | 787 305                 | 0.349                                       |
|           | Namibia                  | NA       | 62            | 823 989                 | 0.075                                       |
|           | Niger                    | NE       | 488           | 1 182 602               | 0.413                                       |
|           | Nigeria                  | NG       | 1203          | 908 978                 | 1.323                                       |
|           | Rwanda                   | RW       | 92            | 25 388                  | 3.624                                       |
|           | Senegal                  | SN       | 311           | 196 200                 | 1.585                                       |
|           | Sierra Leone             | SL       | 12            | 72 281                  | 0.166                                       |
|           | Somalia                  | SO       | 245           | 632 562                 | 0.387                                       |
|           | South Africa             | ZA       | 649           | 1 220 127               | 0.532                                       |
|           | Sudan                    | SD       | 116           | 1 843 196               | 0.063                                       |
|           | Swaziland                | SZ       | 14            | 17 290                  | 0.810                                       |
|           | Togo                     | TG       | 9             | 56 767                  | 0.159                                       |
|           | Tunisia                  | TN       | 60            | 155 148                 | 0.387                                       |
|           | Uganda                   | UG       | 12            | 241 495                 | 0.050                                       |

| Continent  | Country_name                | ISO code | N of profiles | Area (km <sup>2</sup> ) | Profile density (per 1000 km <sup>2</sup> ) |
|------------|-----------------------------|----------|---------------|-------------------------|---------------------------------------------|
|            | United Republic of Tanzania | TZ       | 1647          | 939 588                 | 1.753                                       |
|            | Zambia                      | ZM       | 472           | 751 063                 | 0.628                                       |
|            | Zimbabwe                    | ZW       | 319           | 390 648                 | 0.817                                       |
| Antarctica | Antarctica                  | AQ       | 9             | 12 537 967              | 0.001                                       |
| Asia       | Afghanistan                 | AF       | 19            | 641 827                 | 0.030                                       |
|            | Armenia                     | AM       | 6             | 29 624                  | 0.203                                       |
|            | Azerbaijan                  | AZ       | 4             | 164 780                 | 0.024                                       |
|            | Bahrain                     | BH       | 2             | 673                     | 2.970                                       |
|            | Bangladesh                  | BD       | 16            | 139 825                 | 0.114                                       |
|            | Bhutan                      | BT       | 80            | 37 674                  | 2.123                                       |
|            | China                       | CN       | 1490          | 9 345 214               | 0.159                                       |
|            | Georgia                     | GE       | 9             | 69 785                  | 0.129                                       |
|            | India                       | IN       | 139           | 2 961 118               | 0.047                                       |
|            | Indonesia                   | ID       | 108           | 1 888 620               | 0.057                                       |
|            | Iran (Islamic Republic of)  | IR       | 2             | 1 677 319               | 0.001                                       |
|            | Iraq                        | IQ       | 14            | 435 864                 | 0.032                                       |
|            | Israel                      | IL       | 16            | 20 720                  | 0.772                                       |
|            | Japan                       | JP       | 39            | 373 651                 | 0.104                                       |
|            | Jordan                      | JO       | 40            | 89 063                  | 0.449                                       |
|            | Lebanon                     | LB       | 6             | 10 136                  | 0.592                                       |
|            | Malaysia                    | MY       | 46            | 329 775                 | 0.139                                       |
|            | Mongolia                    | MN       | 7             | 1 564 529               | 0.004                                       |
|            | Nepal                       | NP       | 141           | 147 437                 | 0.956                                       |
|            | Oman                        | OM       | 9             | 308 335                 | 0.029                                       |
|            | Pakistan                    | PK       | 43            | 788 439                 | 0.055                                       |
|            | Philippines                 | PH       | 68            | 296 031                 | 0.230                                       |
|            | Republic of Korea           | KR       | 17            | 99 124                  | 0.172                                       |
|            | Sri Lanka                   | LK       | 13            | 66 173                  | 0.196                                       |
|            | Syrian Arab Republic        | SY       | 66            | 188 128                 | 0.351                                       |
|            | Taiwan                      | TW       | 33            | 36 127                  | 0.913                                       |
|            | Tajikistan                  | TJ       | 5             | 142 004                 | 0.035                                       |
|            | Thailand                    | TH       | 285           | 515 417                 | 0.553                                       |
|            | Turkey                      | TR       | 68            | 781 229                 | 0.087                                       |
|            | United Arab Emirates        | AE       | 6             | 71 079                  | 0.084                                       |
|            | Uzbekistan                  | UZ       | 8             | 449 620                 | 0.018                                       |
|            | Yemen                       | YE       | 284           | 453 596                 | 0.626                                       |
| Europe     | Albania                     | AL       | 63            | 28 682                  | 2.197                                       |
|            | Belarus                     | BY       | 94            | 207 581                 | 0.453                                       |
|            | Belgium                     | BE       | 190           | 30 669                  | 6.195                                       |
|            | Bulgaria                    | BG       | 45            | 111 300                 | 0.404                                       |
|            | Czech Republic              | CZ       | 38            | 78 845                  | 0.482                                       |

| Continent     | Country_name         | ISO code | N of profiles | Area (km <sup>2</sup> ) | Profile density (per 1000 km <sup>2</sup> ) |
|---------------|----------------------|----------|---------------|-------------------------|---------------------------------------------|
|               | Denmark              | DK       | 20            | 44 458                  | 0.450                                       |
|               | Estonia              | EE       | 123           | 45 441                  | 2.707                                       |
|               | Finland              | FI       | 24            | 336 892                 | 0.071                                       |
|               | France               | FR       | 53            | 548 785                 | 0.097                                       |
|               | Germany              | DE       | 51            | 357 227                 | 0.143                                       |
|               | Greece               | GR       | 11            | 132 549                 | 0.083                                       |
|               | Hungary              | HU       | 61            | 93 119                  | 0.655                                       |
|               | Iceland              | IS       | 11            | 102 566                 | 0.107                                       |
|               | Ireland              | IE       | 36            | 69 809                  | 0.516                                       |
|               | Italy                | IT       | 86            | 301 651                 | 0.285                                       |
|               | Latvia               | LV       | 10            | 64 563                  | 0.155                                       |
|               | Lithuania            | LT       | 18            | 64 943                  | 0.277                                       |
|               | Luxembourg           | LU       | 128           | 2621                    | 48.842                                      |
|               | Netherlands          | NL       | 192           | 35 203                  | 5.454                                       |
|               | Norway               | NO       | 10            | 324 257                 | 0.031                                       |
|               | Poland               | PL       | 128           | 311 961                 | 0.410                                       |
|               | Portugal             | PT       | 35            | 91 876                  | 0.381                                       |
|               | Republic of Moldova  | MD       | 32            | 33 798                  | 0.947                                       |
|               | Romania              | RO       | 43            | 238 118                 | 0.181                                       |
|               | Russian Federation   | RU       | 156           | 16 998 830              | 0.009                                       |
|               | Slovakia             | SK       | 40            | 49 072                  | 0.815                                       |
|               | Spain                | ES       | 42            | 505 752                 | 0.083                                       |
|               | Sweden               | SE       | 26            | 449 212                 | 0.058                                       |
|               | Switzerland          | CH       | 10            | 41 257                  | 0.242                                       |
|               | Ukraine              | UA       | 79            | 600 526                 | 0.132                                       |
|               | United Kingdom       | GB       | 53            | 244 308                 | 0.217                                       |
| North America | Barbados             | BB       | 3             | 433                     | 6.928                                       |
|               | Belize               | BZ       | 21            | 21 764                  | 0.965                                       |
|               | Canada               | CA       | 148           | 9 875 646               | 0.015                                       |
|               | Costa Rica           | CR       | 55            | 51 042                  | 1.078                                       |
|               | Cuba                 | CU       | 52            | 110 863                 | 0.469                                       |
|               | Dominican Republic   | DO       | 1             | 48 099                  | 0.021                                       |
|               | El Salvador          | SV       | 9             | 20 732                  | 0.434                                       |
|               | Greenland            | GL       | 5             | 2 165 159               | 0.002                                       |
|               | Guatemala            | GT       | 22            | 109 062                 | 0.202                                       |
|               | Honduras             | HN       | 11            | 112 124                 | 0.098                                       |
|               | Jamaica              | JM       | 76            | 10 965                  | 6.931                                       |
|               | Mexico               | MX       | 12 223        | 1 949 527               | 6.270                                       |
|               | Netherlands Antilles | AN       | 4             | 790                     | 5.066                                       |
|               | Nicaragua            | NI       | 26            | 128 376                 | 0.203                                       |
|               | Panama               | PA       | 25            | 74 850                  | 0.334                                       |
|               | Puerto Rico          | PR       | 30            | 8937                    | 3.357                                       |
|               | Trinidad and Tobago  | TT       | 2             | 5144                    | 0.389                                       |

| Continent     | Country_name                     | ISO code | N of profiles | Area (km <sup>2</sup> ) | Profile density (per 1000 km <sup>2</sup> ) |
|---------------|----------------------------------|----------|---------------|-------------------------|---------------------------------------------|
|               | United States of America         | US       | 50 361        | 9 315 946               | 5.406                                       |
|               | United States Virgin Islands     | VI       | 3             | 352                     | 8.514                                       |
| Oceania       | Australia                        | AU       | 142           | 7 687 634               | 0.018                                       |
|               | Cook Islands                     | CK       | 1             | 241                     | 4.142                                       |
|               | Fiji                             | FJ       | 9             | 18 293                  | 0.492                                       |
|               | Micronesia (Feder. States of)    | FM       | 14            | 740                     | 18.917                                      |
|               | New Zealand                      | NZ       | 20            | 270 415                 | 0.074                                       |
|               | Papua New Guinea                 | PG       | 31            | 462 230                 | 0.067                                       |
|               | Samoa                            | WS       | 17            | 2835                    | 5.996                                       |
|               | Solomon Islands                  | SB       | 1             | 28 264                  | 0.035                                       |
| South America | Argentina                        | AR       | 238           | 2 780 175               | 0.086                                       |
|               | Bolivia (Plurinational State of) | BO       | 77            | 1 084 491               | 0.071                                       |
|               | Brazil                           | BR       | 7842          | 8 485 946               | 0.924                                       |
|               | Chile                            | CL       | 45            | 753 355                 | 0.060                                       |
|               | Colombia                         | CO       | 166           | 1 137 939               | 0.146                                       |
|               | Ecuador                          | EC       | 77            | 256 249                 | 0.300                                       |
|               | French Guiana                    | GF       | 7             | 83 295                  | 0.084                                       |
|               | Guyana                           | GY       | 43            | 211 722                 | 0.203                                       |
|               | Peru                             | PE       | 147           | 1 290 640               | 0.114                                       |
|               | Suriname                         | SR       | 27            | 145 100                 | 0.186                                       |
|               | Uruguay                          | UY       | 131           | 177 811                 | 0.737                                       |
|               | Venezuela (Bolivarian Rep. of)   | VE       | 170           | 912 025                 | 0.186                                       |
| World         | World (total)                    | WD       | 94 441        | 137 770 610             | 0.685                                       |

Note: Country names and areas are based on the Global Administrative Layers (GAUL) database, see:

<http://www.fao.org/geonetwork/srv/en/metadata.show?id=12691>.

## Acknowledgements

The development of WoSIS has been made possible thanks to the contributions and shared knowledge of a steadily growing number of data providers, including soil survey organisations, research institutes and individual experts, whose contributions are gratefully acknowledged. A detailed list of data providers is available at [http://www.isric.org/content/wosis-cooperating-](http://www.isric.org/content/wosis-cooperating-institutions-and-experts)

5 [institutions-and-experts](http://www.isric.org/content/wosis-cooperating-institutions-and-experts) for details.

## References

- 10 Arrouays, D., Grundy, M. G., Hartemink, A. E., Hempel, J. W., Heuvelink, G. B. M., Hong, S. Y., Lagacherie, P., Lelyk, G., McBratney, A. B., McKenzie, N. J., Mendonca-Santos, M. d. L., Minasny, B., Montanarella, L., Odeh, I. O. A., Sanchez, P. A., Thompson, J. A., Zhang, G.-L., and Donald, L. S.: GlobalSoilMap: Toward a Fine-Resolution Global Grid of Soil Properties, *Advances in Agronomy*, 125, 93-134, <http://dx.doi.org/10.1016/B978-0-12-800137-0.00003-0>, 2014.
- 15 Baritz, R., Erdogan, H., Fujii, K., Takata, Y., Nocita, M., Bussian, B., Batjes, N. H., Hempel, J., Wilson, P., and Vargas, R.: Harmonization of methods, measurements and indicators for the sustainable management and protection of soil resources (Providing mechanisms for the collation, analysis and exchange of con-sistent and comparable global soil data and information), Global Soil Partnership, FAO. 44 pp., 2014.
- Batjes, N. H.: World Inventory of Soil Emission Potentials: WISE 2.1 - Profile database user manual and coding protocols, ISRIC, Wageningen. Tech. Pap. 26, 56 pp., 1995.
- 20 Batjes, N. H.: Harmonised soil profile data for applications at global and continental scales: updates to the WISE database, *Soil Use and Management*, 25, 124-127 <http://dx.doi.org/10.1111/j.1475-2743.2009.00202.x>, 2009.
- Batjes, N. H.: Harmonised soil property values for broad-scale modelling (WISE30sec) with estimates of global soil carbon stocks, *Geoderma*, 269, 61-68, <http://dx.doi.org/10.1016/j.geoderma.2016.01.034>, 2016.
- 25 Chapman, A. D.: Principles of Data Quality, version 1.0, Global Biodiversity Information Facility, Copenhagen., Copenhagen. 58 pp., 2005.
- FAO-GSP: Plan of action for Pillar Four of the Global Soil Partnership : Building an enduring and authoritative global system to monitor and forecast the condition of the Earth's soil resources FAO Global Soil Partnership, Rome. 33 pp., 2014a.
- FAO-GSP: Plan of Action for Pillar Five of the Global Soil Partnership: Harmonization of methods, measurements and indicators for the sustainable management and protection of soil resources, FAO Global Soil Partnership, Rome. 37 pp., 30 2014b.
- FAO and ITPS: Status of the world's soil resources (SWSR) - Main report, Food and Agriculture Organization of the United Nations and Intergovernmental Technical Panel on Soils, Rome, 650 pp., 2015.
- GEO: GEOSS data sharing action plan, Group on Earth Observations, Geneva. 8 pp., 2010.
- Global Earth Observation System of Systems (GEOSS): <http://www.earthobservations.org/geoss.shtml> access: 14 October 35 2016, 2012.
- GlobalSoilMap: Specifications Version 1 GlobalSoilMap.net products (Release 2.1), 50 pp., 2013.
- GODAN: How can we improve agriculture, food and nutrition with open data?, Open Data Institute London. Report UK20150528, 33 pp., 2015.

- GS Soil: Discover INSPIRE compliant harmonised soil data and services, GS Soil Consortium, Paris-Lodon University Salzburg GS Soil 06/2009 -05-2012, 60 pp., 2008.
- Hendriks, C. M. J., Stoorvogel, J. J., and Claessens, L.: Exploring the challenges with soil data in regional land use analysis, *Agricultural Systems*, 144, 9-21, <http://dx.doi.org/10.1016/j.agsy.2016.01.007>, 2016.
- 5 Hengl, T., Mendes de Jesus, J., MacMillan, R. A., Batjes, N. H., Heuvelink, G. B. M., Ribeiro, E. C., Samuel-Rosa, A., Kempen, B., Leenaars, J. G. B., Walsh, M. G., and Gonzalez, M. R.: SoilGrids1km— global soil information based on automated mapping, *PLoS ONE*, 9, e105992, <http://dx.doi.org/10.1371/journal.pone.0105992>, 2014.
- Hengl, T., Heuvelink, G. B. M., Kempen, B., Leenaars, J. G. B., Walsh, M. G., Shepherd, K. D., Sila, A., MacMillan, R. A.,  
10 Mendes de Jesus, J., Tamene, L., and Tondoh, J. E.: Mapping Soil Properties of Africa at 250 m Resolution: Random Forests Significantly Improve Current Predictions, *PLoS ONE*, 10, e0125814, <http://dx.doi.org/10.1371/journal.pone.0125814>, 2015.
- Hengl, T., Mendes de Jesus, J., Heuvelink, G. B. M., Ruiperez Gonzalez, M., Kilibarda, M., Blagotic, A., Shangguan, W., Wright, M. N., Geng, X., Bauer-Marschallinger, B., Guevara, M. A., Vargas, R., MacMillan, R. A., Batjes, N. H., Leenaars, J. G. B., Wheeler, I., Mantel, S., and Kempen, B.: SoilGrids250m: Global gridded soil information based on machine  
15 learning, *PLoS ONE*, ([http://gsif.isric.org/lib/exe/fetch.php?media=wiki:soilgrids250m\\_global\\_gridded\\_preprint.pdf](http://gsif.isric.org/lib/exe/fetch.php?media=wiki:soilgrids250m_global_gridded_preprint.pdf)), 2016.
- INSPIRE Data specifications - Infrastructure for spatial information in the European Community: <http://inspire.ec.europa.eu/index.cfm/pageid/2>, access: 25.04.2016, 2015.
- ISRIC Soil Information System (ISIS): <http://isis.isric.org/>, access: 23 June 2016, 2016.
- ISO 10390:2005: Soil quality -- Determination of pH: [http://www.iso.org/iso/catalogue\\_detail.htm?csnumber=40879](http://www.iso.org/iso/catalogue_detail.htm?csnumber=40879), access:  
20 10 October 2016, 2015.
- ISRIC: Data and Software Policy, ISRIC - World Soil Information (WDC - Soils) Wageningen. 6 pp., 2016.
- IUSS Working Group on Soil Information Standards <http://www.soilinformationstandards.org/>, access: 12 March 2016, 2015.
- Jankauskas, B., Jankauskiene, G., Slepeliene, A., Fullen, M. A., and Booth, C. A.: International comparison of analytical methods of determining the soil organic matter content of Lithuanian eutric Albeluvisols, *Communications in Soil Science and Plant Analysis*, 37, 707-720, <http://dx.doi.org/10.1080/00103620600563499>, 2006.
- 25 Jones, P. G., and Thornton, P. K.: Representative soil profiles for the Harmonized World Soil Database at different spatial resolutions for agricultural modelling applications, *Agricultural Systems*, 139, 93-99, <http://dx.doi.org/10.1016/j.agsy.2015.07.003>, 2015.
- Landon, J. R.: Booker Tropical Soil Manual, Longman Scientific & Technical, New York, 474 pp., 1991.
- 30 Leenaars, J. G. B.: Africa Soil Profiles Database -- A compilation of georeferenced and standardised legacy soil profile data for Sub Saharan Africa (version 1.1), Africa Soil Information Service (AfSIS) and ISRIC - World Soil Information, Wageningen. Report 2013/03, 160 pp., 2013.
- Leenaars, J. G. B., Kempen, B., van Oostrum, A. J. M., and Batjes, N. H.: Africa Soil Profiles Database: a compilation of georeferenced and standardised legacy soil profile data for Sub-Saharan Africa GlobalSoilMap - Basis of the global spatial  
35 information system, Orléans 2014, 51-57,
- Letten, S., Vos, B. D., Quataert, P., van Wesemael, B., Muys, B., and van Orshoven, J.: Variable carbon recovery of Walkley-Black analysis and implications for national soil organic carbon accounting, *European Journal of Soil Science*, 58, 1244-1253, <http://dx.doi.org/10.1111/j.1365-2389.2007.00916.x> 2007.
- Luo, Y., Ahlström, A., Allison, S. D., Batjes, N. H., Brovkin, V., Carvalhais, N., Chappell, A., Ciais, P., Davidson, E. A., Finzi, A., and al., e.: Towards more realistic projections of soil carbon dynamics by Earth System Models, *Global Biogeochem. Cycles*, 30, 40-56, <http://dx.doi.org/10.1002/2015GB005239>, 2016.
- 40 Maire, V., Wright, I. J., Prentice, I. C., Batjes, N. H., Bhaskar, R., van Bodegom, P. M., Cornwell, W. K., Ellsworth, D., Niinemets, Ü., Ordonez, A., Reich, P. B., and Santiago, L. S.: Global effects of soil and climate on leaf photosynthetic traits and rates, *Global Ecology and Biogeography*, 24, 706-715, <http://dx.doi.org/10.1111/geb.12296>, 2015.
- 45 MEA: Ecosystems and Human Well-Being: Synthesis, Millennium Ecosystem Assessment Island Press, Washington, 2005.

- North American Proficiency Testing (NAPT) Program: <http://www.naptprogram.org/>, access: 27.04.2016, 2015.
- Omuto, C., Nachtergaele, F., and Vargas Rojas, R.: State of the Art Report on Global and Regional Soil Information: Where are we? Where to go?, FAO, Italy. 69 pp., 2012.
- Porter, C. H., Villalobos, C., Holzworth, D., Nelson, R., White, J. W., Athanasiadis, I. N., Zhang, M., Janssen, S., Knapen, R., Jones, J. W., Boote, K. J., Hargreaves, J., and Antle, J. M.: Data Interoperability Tools for Regional Integrated Assessments, in: Handbook of Climate Change and Agroecosystems, 147-171, 2015.
- Ribeiro, E., Batjes, N. H., Leenaars, J. G. B., Van Oostrum, A. J. M., and Mendes de Jesus, J.: Towards the standardization and harmonization of world soil data: Procedures Manual ISRIC World Soil Information Service (WoSIS version 2.0) ISRIC - World Soil Information, Wageningen. Report 2015/03, 110 pp., 2015.
- Ritchie, A.: OGC Soil Data Interoperability Experiment, Open Geospatial Consortium, 74 pp., 2016.
- Shepherd, K. D., and Walsh, M. G.: Development of reflectance spectral libraries for characterization of soil properties, Soil Science Society of America Journal, 66, 988–998, 2002.
- Soil Survey Division Staff: Soil survey manual, Soil Conservation Service, U.S. Department of Agriculture, Washington, 503 pp., 1993.
- Soil Survey Staff: Soil Survey Laboratory Information Manual (Ver. 2.0), National Soil Survey Center, Soil Survey Laboratory, USDA-NRCS, Lincoln (NE). Soil Survey Investigation Report No. 45, 506 pp., 2011.
- UNEP: The benefits of soil carbon - managing soils for multiple, economic, societal and environmental benefits, in: UNEP Yearbook - Emerging issues in our global environment 2012, United Nations Environmental Programme, Nairobi, 19-33, 2012.
- UNEP: UNEP Yearbook - Emerging issues in our global environment 2014, UNEP Yearbooks, United Nations Environmental Programme, Nairobi, 68 pp., 2014.
- Van Engelen, V. W. P.: Standardizing soil data (*e-SOTER* regional pilot platform as EU contribution to a Global Soil Information System), International Innovation, June, 48-49, 2011.
- van Engelen, V. W. P., and Dijkshoorn, J. A.: Global and National Soils and Terrain Digital Databases (SOTER) - Procedures manual (Ver. 2.0), IUSS, ISRIC and FAO, Wageningen. ISRIC Report 2013/04, 191 pp., 2013.
- van Reeuwijk, L. P.: Guidelines for quality management in soil and plant laboratories, FAO, Rome. 143 pp., 1998.
- van Reeuwijk, L. P.: Procedures for soil analysis (6th ed.), ISRIC, Wageningen. Technical Paper 9, 81 pp., 2002.
- Viscarra Rossel, R. A., Behrens, T., Ben-Dor, E., Brown, D. J., Demattê, J. A. M., Shepherd, K. D., Shi, Z., Stenberg, B., Stevens, A., Adamchuk, V., Aichi, H., Barthès, B. G., Bartholomeus, H. M., Bayer, A. D., Bernoux, M., Böttcher, K., Brodský, L., Du, C. W., Chappell, A., Fouad, Y., Genot, V., Gomez, C., Grunwald, S., Gubler, A., Guerrero, C., Hedley, C. B., Knadel, M., Morrás, H. J. M., Nocita, M., Ramirez-Lopez, L., Roudier, P., Campos, E. M. R., Sanborn, P., Sellitto, V. M., Sudduth, K. A., Rawlins, B. G., Walter, C., Winowiecki, L. A., Hong, S. Y., and Ji, W.: A global spectral library to characterize the world's soil, Earth-Science Reviews, doi: 10.1016/j.earscirev.2016.1001.1012, <http://dx.doi.org/10.1016/j.earscirev.2016.01.012>, 2016.
- WEPAL. Wageningen Evaluating Programmes for Analytical Laboratories: [http://www.wepal.nl/website/about\\_wepal/History.htm](http://www.wepal.nl/website/about_wepal/History.htm), access: 28.05.2016, 2015.
- Wilson, P. L.: Global harmonisation and exchange of soil data, SciDataCon 2016: Advancing the Frontiers of Data in Research, Denver (11-13 September 2016), Colorado, USA, 2016.

## Figure captions

**Figure 1.** General procedure for processing data in WoSIS

- 5 **Figure 2.** Flagging of repeated profiles between the AfSP, ISIS, WISE and SOTER databases (see text for explanation of abbreviations)

**Figure 3.** Serving consistent soil layers from WoSIS to the user community through ISRIC's evolving spatial data infrastructure

- 10 **Figure 4.** Location of [fp](#) soil profiles [provided](#) in the “July 2016” snapshot of WoSIS.  
[\(See Appendix C for the number of profiles by country\)](#)



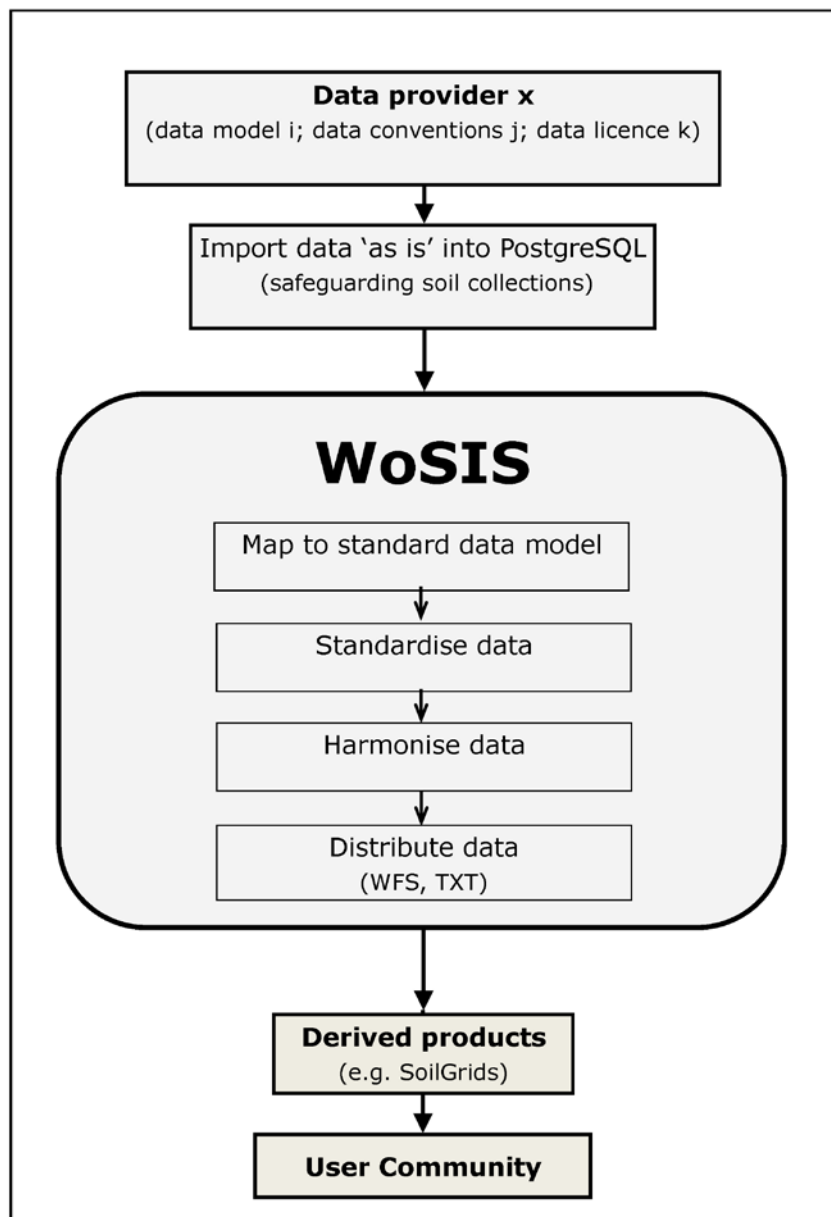

Figure 1. General procedure for processing data in WoSIS

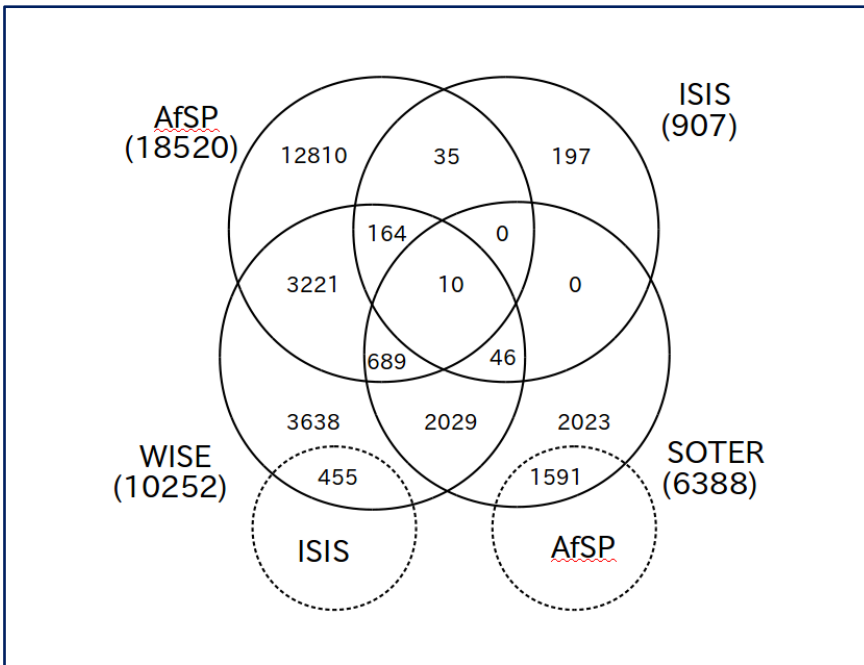

**Figure 2.** Flagging of repeated profiles between the AfSP, ISIS, WISE and SOTER databases (see text for explanation of abbreviations)

5

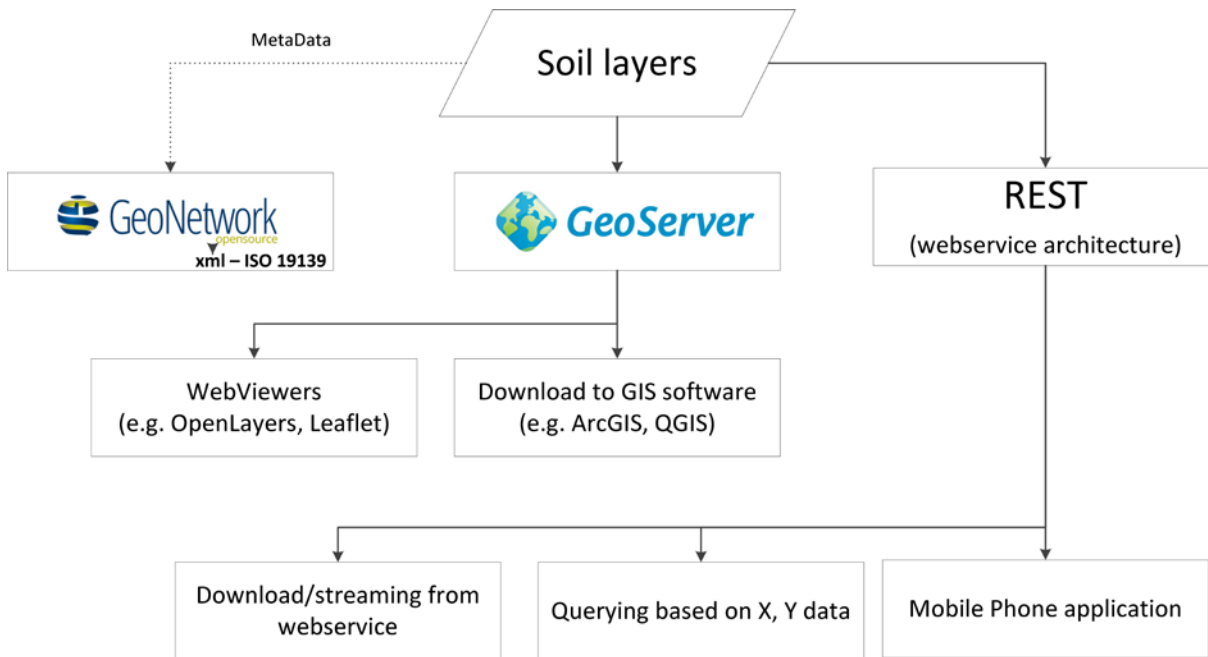

**Figure 3.** Serving consistent soil layers from WoSIS to the user community through ISRIC's evolving spatial data infrastructure

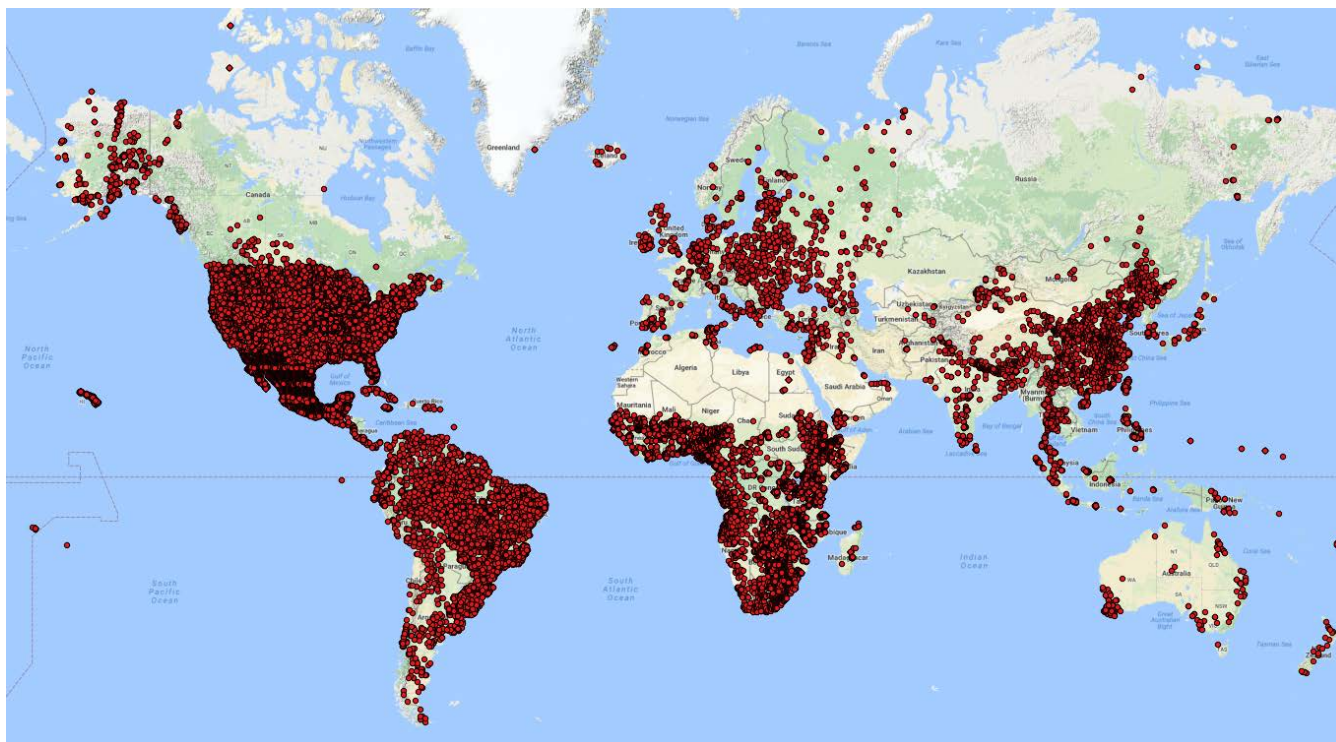

5

**Figure 4.** Location of  $p$  soil profiles [provided](#) in the “July 2016” snapshot of WoSIS.  
[\(See Appendix C for the number of profiles by country\)](#)
